# Supplementary material for: Diagnostic Added-Value of Serum CA-125 on the IOTA Simple Rules and Derivation of Practical Combined Prediction Models (IOTA SR X CA-125)
Source: PubMed Central journal article supplement (PMC7912113; doi:10.3390/diagnostics11020173), 2021-01-26
Supplement: diagnostics-11-00173-s001.pdf [file diagnostics-11-00173-s001.pdf]

**Supplementary Table S1.** Patient clinical characteristics and IOTA Simple Rules results in premenopausal women (n=364)

| Parameters                         | Malignant<br>(n=87) |                | Benign<br>(n=277) |              | P-value |
|------------------------------------|---------------------|----------------|-------------------|--------------|---------|
|                                    | n                   | (%)            | n                 | (%)          |         |
| <b>Clinical characteristics</b>    |                     |                |                   |              |         |
| Age (year)*                        | 36.3                | ±10.3          | 37.6              | ±9.0         | 0.260   |
| Nulliparity                        | 53                  | (60.9)         | 109               | (39.4)       | 0.001   |
| <b>Biomarker</b>                   |                     |                |                   |              |         |
| Serum CA-125, (U/ml)**             | 384.9               | (123.4, 708.2) | 40.5              | (24.0, 58.6) | <0.001  |
| Range (min-max)                    |                     | (16.4-1896.7)  |                   | (5.4-278.3)  |         |
| <b>IOTA Simple Rules features</b>  |                     |                |                   |              |         |
| Malignant tumor (M-features)       |                     |                |                   |              |         |
| M1                                 | 46                  | (52.9)         | 15                | (5.4)        | <0.001  |
| M2                                 | 23                  | (26.4)         | 10                | (3.6)        | <0.001  |
| M3                                 | 22                  | (25.3)         | 21                | (7.6)        | <0.001  |
| M4                                 | 51                  | (58.6)         | 22                | (7.9)        | <0.001  |
| M5                                 | 60                  | (69.0)         | 31                | (11.2)       | <0.001  |
| Benign tumor (B-features)          |                     |                |                   |              |         |
| B1                                 | 5                   | (5.8)          | 145               | (52.4)       | <0.001  |
| B2                                 | 0                   | (0)            | 13                | (4.7)        | 0.044   |
| B3                                 | 3                   | (3.5)          | 56                | (20.2)       | <0.001  |
| B4                                 | 7                   | (8.1)          | 60                | (21.7)       | 0.004   |
| B5                                 | 24                  | (27.6)         | 244               | (88.1)       | <0.001  |
| <b>IOTA Simple Rules diagnosis</b> |                     |                |                   |              |         |
| Benign                             | 6                   | (6.9)          | 208               | (75.1)       | NA      |
| Malignant                          | 59                  | (67.8)         | 19                | (6.9)        | NA      |
| Inconclusive                       | 22                  | (25.3)         | 50                | (18.1)       | NA      |

**Abbreviations:** IOTA, International Ovarian Tumor Analysis; SD, standard deviation; IQR, interquartile range; NA, not applicable.

\*Mean±SD

\*\*Median (IQR)

**Supplementary Table S2.** Patient clinical characteristics and IOTA Simple Rules results in postmenopausal women (n=115)

| Parameters                         | Malignant<br>(n=58) |                | Benign<br>(n=57) |              | P-value |
|------------------------------------|---------------------|----------------|------------------|--------------|---------|
|                                    | n                   | (%)            | n                | (%)          |         |
| <b>Clinical characteristics</b>    |                     |                |                  |              |         |
| Age (year)*                        | 59.0                | ±8.7           | 55.3             | ±7.8         | 0.018   |
| Nulliparity                        | 22                  | (37.9)         | 28               | (49.1)       | 0.262   |
| <b>Biomarker</b>                   |                     |                |                  |              |         |
| Serum CA-125, (U/ml)**             | 492.8               | (122.1, 732.1) | 33.4             | (20.4, 47.4) | <0.001  |
| Range (min-max)                    |                     | (13.7-2023.6)  |                  | (8.4-269.4)  |         |
| <b>IOTA Simple Rules features</b>  |                     |                |                  |              |         |
| Malignant tumor (M-features)       |                     |                |                  |              |         |
| M1                                 | 27                  | (46.6)         | 1                | (1.8)        | <0.001  |
| M2                                 | 11                  | (19.0)         | 1                | (1.8)        | 0.004   |
| M3                                 | 10                  | (17.2)         | 5                | (8.8)        | 0.268   |
| M4                                 | 23                  | (39.7)         | 4                | (7.0)        | <0.001  |
| M5                                 | 36                  | (62.1)         | 4                | (7.0)        | <0.001  |
| Benign tumor (B-features)          |                     |                |                  |              |         |
| B1                                 | 4                   | (6.9)          | 24               | (42.1)       | <0.001  |
| B2                                 | 1                   | (1.7)          | 4                | (7.0)        | 0.206   |
| B3                                 | 2                   | (3.5)          | 10               | (17.5)       | 0.016   |
| B4                                 | 10                  | (17.2)         | 18               | (31.6)       | 0.085   |
| B5                                 | 18                  | (31.0)         | 53               | (93.0)       | <0.001  |
| <b>IOTA Simple Rules diagnosis</b> |                     |                |                  |              |         |
| Benign                             | 13                  | (22.4)         | 45               | (79.0)       | NA      |
| Malignant                          | 39                  | (67.2)         | 3                | (5.3)        | NA      |
| Inconclusive                       | 6                   | (10.3)         | 9                | (15.8)       | NA      |

**Abbreviations:** IOTA, International Ovarian Tumor Analysis; SD, standard deviation; IQR, interquartile range; NA, not applicable.

\*Mean±SD

\*\*Median (IQR)

**Supplementary Table S3.** Histopathological classification of ovarian tumors in premenopausal and postmenopausal women

| Histopathological classification | Premenopausal<br>(n=364) |               | Postmenopausal<br>(n=115) |               | Overall<br>(n=479) |               |
|----------------------------------|--------------------------|---------------|---------------------------|---------------|--------------------|---------------|
|                                  | n                        | (%)           | n                         | (%)           | n                  | (%)           |
| <b>Malignant tumors</b>          | <b>76</b>                | <b>(20.8)</b> | <b>54</b>                 | <b>(46.9)</b> | <b>130</b>         | <b>(27.2)</b> |
| Serous carcinoma                 | 19                       | (5.2)         | 12                        | (10.4)        | 31                 | (6.5)         |
| Endometrioid carcinoma           | 20                       | (5.5)         | 11                        | (9.6)         | 31                 | (6.5)         |
| Mucinous carcinoma               | 2                        | (0.5)         | 15                        | (12.9)        | 17                 | (3.5)         |
| Clear cell carcinoma             | 7                        | (1.9)         | 5                         | (4.4)         | 12                 | (2.5)         |
| Yolk sac tumor                   | 2                        | (0.5)         | 1                         | (0.9)         | 3                  | (0.6)         |
| Dysgerminoma                     | 4                        | (1.1)         | 0                         | (0)           | 4                  | (0.8)         |
| Sex-cord stromal tumor           | 6                        | (1.7)         | 1                         | (0.9)         | 7                  | (1.5)         |
| Other tumors                     | 4                        | (1.1)         | 3                         | (2.6)         | 7                  | (1.5)         |
| Metastatic carcinoma             | 12                       | (3.3)         | 6                         | (5.2)         | 18                 | (3.8)         |
| <b>Borderline tumors</b>         | <b>11</b>                | <b>(3.1)</b>  | <b>4</b>                  | <b>(3.5)</b>  | <b>15</b>          | <b>(3.0)</b>  |
| Borderline serous tumor          | 5                        | (1.4)         | 1                         | (0.9)         | 6                  | (1.2)         |
| Borderline mucinous tumor        | 6                        | (1.7)         | 3                         | (2.6)         | 9                  | (1.8)         |
| Borderline endometrioid tumor    | 0                        | (0)           | 0                         | (0)           | 0                  | (0)           |
| <b>Benign tumors</b>             | <b>277</b>               | <b>(76.1)</b> | <b>87</b>                 | <b>(49.6)</b> | <b>364</b>         | <b>(69.8)</b> |
| Endometriotic cyst               | 95                       | (26.1)        | 11                        | (9.6)         | 106                | (22.1)        |
| Mature cystic teratoma           | 52                       | (14.3)        | 13                        | (11.3)        | 65                 | (13.6)        |
| Mucinous cystadenoma             | 19                       | (5.2)         | 12                        | (10.4)        | 31                 | (6.5)         |
| Serous cystadenoma               | 27                       | (7.4)         | 7                         | (6.1)         | 34                 | (7.1)         |
| Pseudocyst                       | 25                       | (6.9)         | 5                         | (4.4)         | 30                 | (6.3)         |
| Leiomyoma                        | 25                       | (6.9)         | 3                         | (2.6)         | 28                 | (5.8)         |
| Other tumors                     | 34                       | (9.3)         | 6                         | (5.2)         | 40                 | (8.4)         |

**Supplementary Table S4.** Results of internal validation with bootstrap resampling procedures

| <b>Parameters or statistics</b> | <b>Mean</b> | <b>SD</b> | <b>Min</b> | <b>Max</b> |
|---------------------------------|-------------|-----------|------------|------------|
| <b>Premenopausal model</b>      |             |           |            |            |
| Apparent AuROC                  | 0.948113    | 0.017543  | 0.877739   | 0.991503   |
| Apparent CITL                   | -0.00969    | 0.10411   | -0.38092   | 0.276765   |
| Apparent slope                  | 8.354806    | 0.777098  | 6.58501    | 11.35269   |
| Test AuROC                      | 0.944209    | 0.0013    | 0.939541   | 0.947633   |
| Test CITL                       | 0.006266    | 0.101979  | -0.28934   | 0.343617   |
| Test slope                      | 0.982131    | 0.066177  | 0.81173    | 1.220379   |
| Optimism AuROC                  | 0.003904    | 0.017454  | -0.06898   | 0.046568   |
| Optimism CITL                   | -0.01595    | 0.205918  | -0.72454   | 0.566104   |
| Optimism slope                  | 0.017869    | 0.066177  | -0.22038   | 0.18827    |
| <b>Postmenopausal model</b>     |             |           |            |            |
| Apparent AuROC                  | 0.977092    | 0.014082  | 0.919048   | 0.999455   |
| Apparent CITL                   | 0.009766    | 0.208748  | -0.5625    | 0.566503   |
| Apparent slope                  | 9.995468    | 25.09239  | 5.428964   | 512.292    |
| Test AuROC                      | 0.976059    | 0.001861  | 0.968845   | 0.980944   |
| Test CITL                       | -0.00614    | 0.213661  | -0.52381   | 0.593935   |
| Test slope                      | 0.97512     | 0.087469  | 0.773721   | 1.262725   |
| Optimism AuROC                  | 0.001033    | 0.014131  | -0.05645   | 0.024802   |
| Optimism CITL                   | 0.015903    | 0.421316  | -1.15643   | 1.025843   |
| Optimism slope                  | 0.02488     | 0.087469  | -0.26273   | 0.226279   |

**Abbreviations:** SD, standard deviation; Min, minimum; Max, maximum; AuROC, area under the receiver operating characteristic curve; CITL, calibration-in-the-large.
